# Supplementary material for: Positionally biased gene loss after whole genome duplication: Evidence from human, yeast, and plant
Source: HighWire-hosted journal article supplement (doi:10.1101/gr.131953.111), 2012-07-26
Supplement: Supp_Fig_Legends.docx [file Supp_Fig_Legends.docx]

**Figure S1. Gene losses after two rounds of whole genome duplications.** Rectangles and horizontal lines represent genes and chromosomes, respectively. Red and green lines indicate *cis- and* *trans*-PPIs, respectively. White rectangles indicate genes prior to the first WGD. Blue and black rectangles show extant-paired ohnologs and singletons, respectively. (*A*) Biased gene loss model. *Cis*-PPIs have been retained asymmetrically among four paralogons (A, B, C and D) after two rounds of WGD events. (*B*) Random gene loss model. The number of *trans*-PPIs would increase after two rounds of WGD events under this model.

**Figure S2. Independent gene losses and a single large deletion.** Rectangles and horizontal lines represent genes and chromosomes, respectively. Red and green lines indicate *cis- and trans*-PPIs, respectively. White rectangles indicate genes prior to WGD. Blue and black rectangles show extant-paired ohnologs and singletons, respectively. Gray lines indicate extant-paired ohnologous relationships. Large and small orange crosses represent a single large deletion including multiple genes and independent gene losses, respectively. (*A*) When *cis*-interacting genes have an intervening retained ohnolog, the independent gene losses are distinguishable from a single large deletion. (*B*) Identification of PPIs between singletons separated by a retained ohnolog. Numbers (1, 2 and 3) indicate gene order of pre-WGD yeast ancestor. The ancestral gene order for yeasts is available from YGOB. A *trans*-PPI in this panel has an intervening retained ohnolog based on the ancestral gene order (not present day gene order).

**Figure S3. Ancestral gene-distance for *cis*- and *trans*-PPIs in yeast.** X-axis indicates thatdistance (counted in number of genes based on ancestral gene order) between an interacting singleton pair. Y-axis indicates the frequency of the interacting pairs. Red and green bars show *cis*- and *trans*-PPIs, respectively. Upper and lower panels are based on DIP and BioGRID PPIs, respectively.

**Figure S4. Pattern of PPI retention after Fish specific genome duplication.** Rectangles and horizontal lines represent genes and chromosomes, respectively. Red and green lines indicate *cis- and trans*-PPIs, respectively. Blue and black rectangles show extant-paired ohnologs and singletons, respectively. Fish specific genome duplication (FSGD) occurred in the fish lineage. There are two scenarios which are *cis*-retention and *trans*-retention after gene losses following FSGD. A *cis-*PPI has been retained in the human paralogon from common ancestor of human and fish, and therefore we infer that *cis*-PPIs are more likely to be retained in *cis* even in the fish sister paralogon.
